# Supplementary material for: Combination of Plasma-Based Metabolomics and Machine Learning Algorithm Provides a Novel Diagnostic Strategy for Malignant Mesothelioma
Source: MDPI journal article supplement (doi:10.3390/diagnostics11071281), 2021-07-16
Supplement: s1 [file s1]

Table S1. AUC of ROC; sensitivity and specificity at optimal cut-off value for each metabolite and the machine learning model.

| Model                            | Train set |             |             |
|----------------------------------|-----------|-------------|-------------|
|                                  | AUC       | Specificity | Sensitivity |
| Taurocholic acid                 | 0.8421    | 0.6667      | 0.9474      |
| Uracil                           | 0.8399    | 0.8333      | 0.8421      |
| Biliverdin                       | 0.8289    | 0.6667      | 0.9474      |
| Histidine                        | 0.8180    | 0.8750      | 0.6842      |
| Tauroursodeoxycholic acid        | 0.8048    | 0.6250      | 0.8947      |
| Pyrroline hydroxycarboxylic acid | 0.8026    | 1.0000      | 0.6316      |
| Phenylalanine                    | 0.8004    | 0.9583      | 0.5789      |
| Random forest model (RF)         | 1.0000    | 1.0000      | 1.0000      |
